# Supplementary material for: SRSF1-dependent inhibition of C9ORF72-repeat RNA nuclear export: genome-wide mechanisms for neuroprotection in amyotrophic lateral sclerosis
Source: PubMed Central journal article supplement (PMC8353793; doi:10.1186/s13024-021-00475-y), 2021-08-10

**A**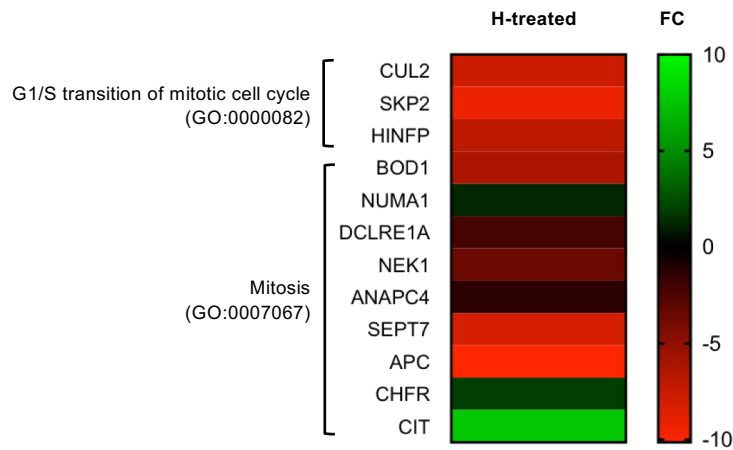**B**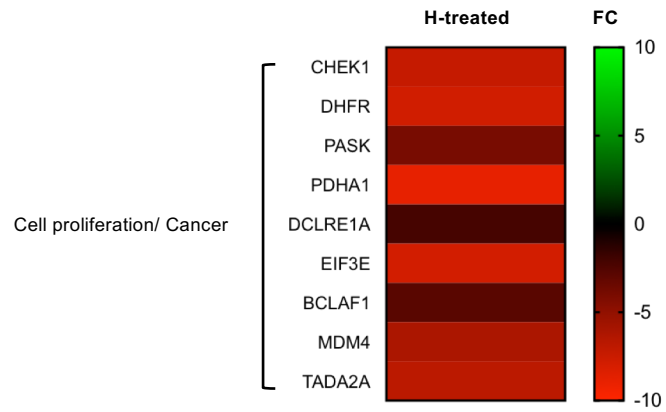

Whitfield LK et al. Nature Reviews Cancer 2006; 6:99–106  
 Waldman YY et al. PLoS Genet 2013; 9(9) e1003806.

**C**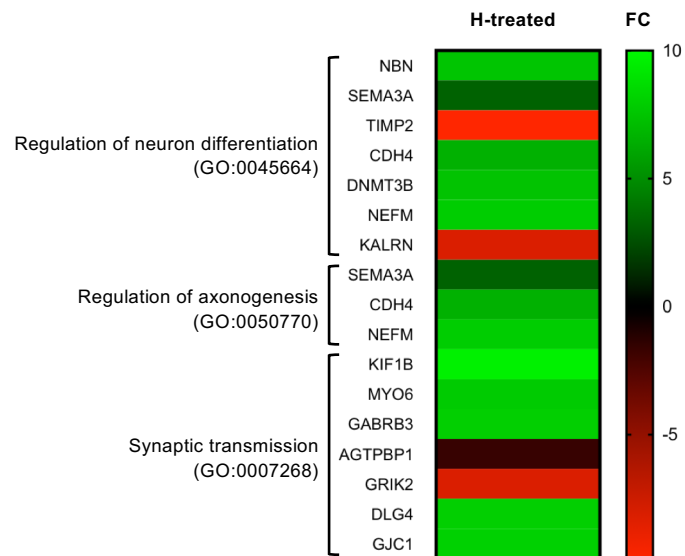

Supplement: 13024_2021_475_MOESM8_ESM.pdf [file 13024_2021_475_MOESM8_ESM.pdf]
