# Supplementary material for: SRSF1-dependent inhibition of C9ORF72-repeat RNA nuclear export: genome-wide mechanisms for neuroprotection in amyotrophic lateral sclerosis
Source: PubMed Central journal article supplement (PMC8353793; doi:10.1186/s13024-021-00475-y), 2021-08-10
Supplement: 13024_2021_475_MOESM12_ESM.pdf [file 13024_2021_475_MOESM12_ESM.pdf]

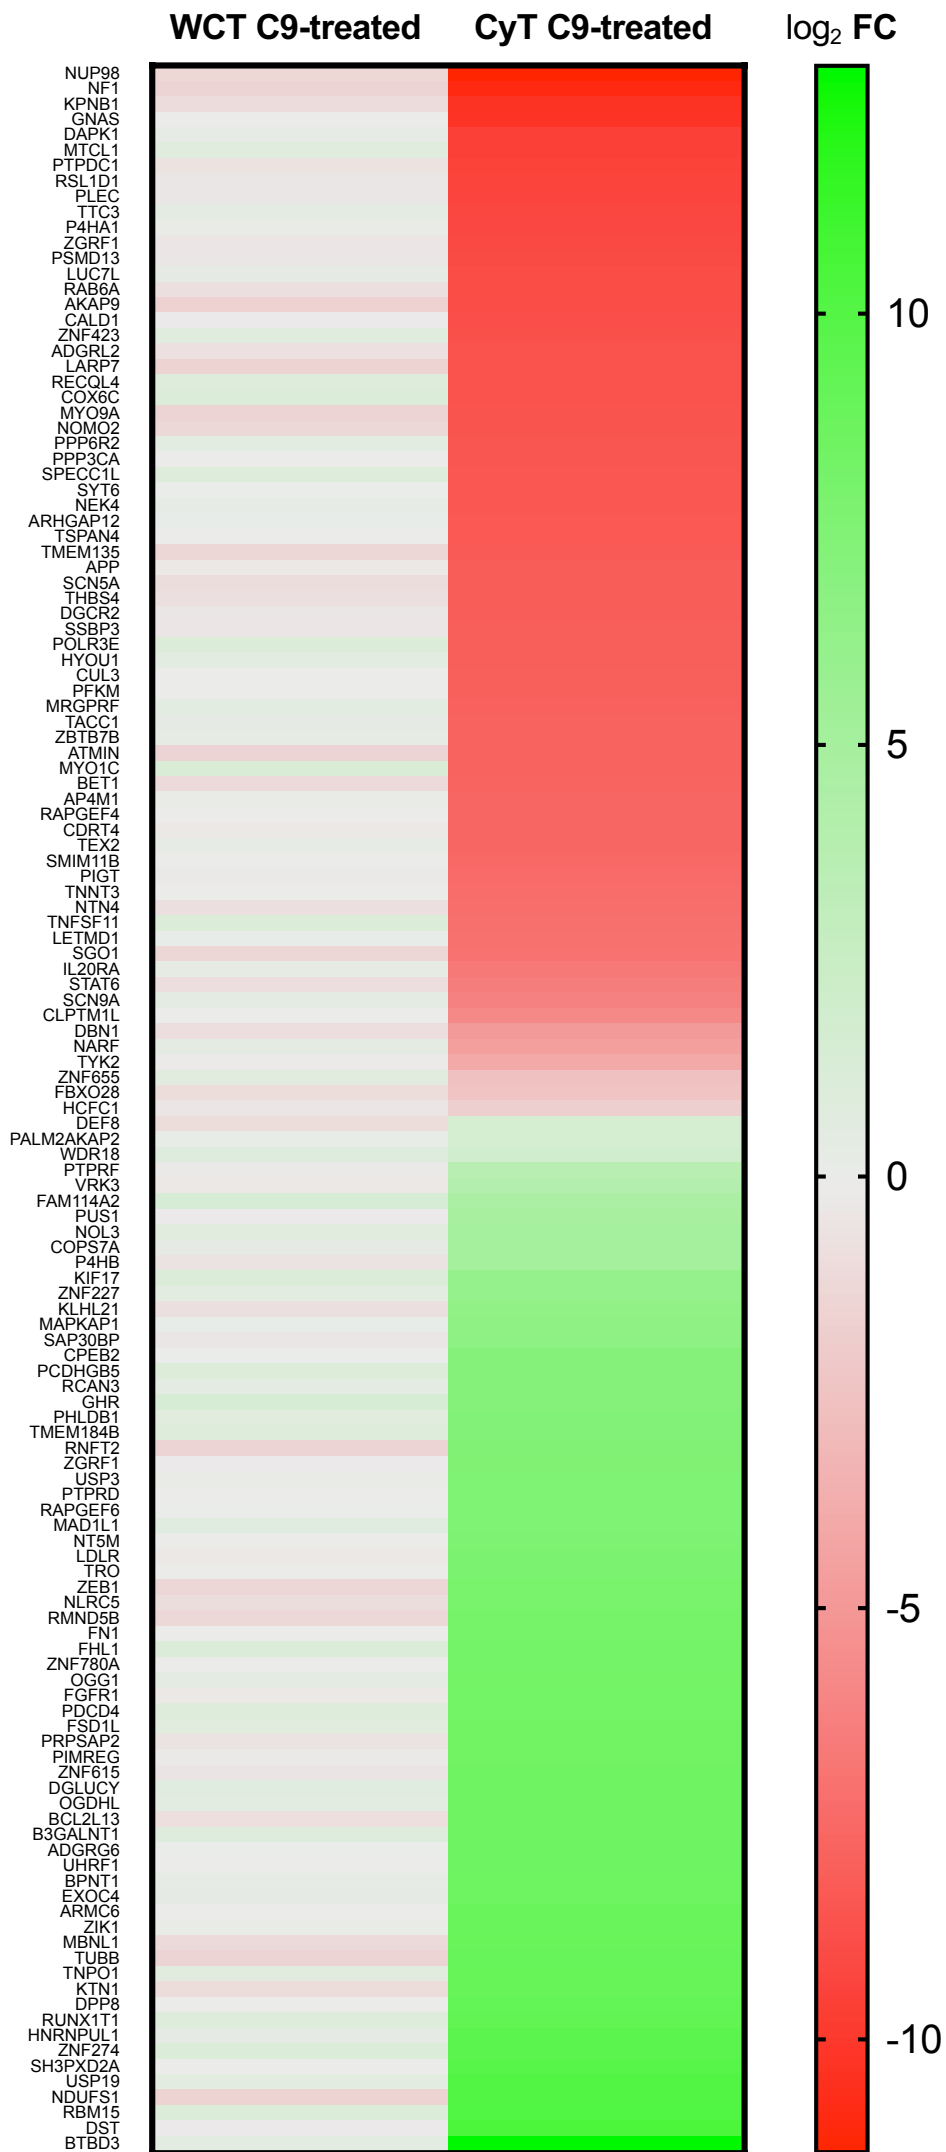

Supplementary Figure 2
