# Supplementary material for: SRSF1-dependent inhibition of C9ORF72-repeat RNA nuclear export: genome-wide mechanisms for neuroprotection in amyotrophic lateral sclerosis
Source: PubMed Central journal article supplement (PMC8353793; doi:10.1186/s13024-021-00475-y), 2021-08-10

■ Healthy + C-RNAi      ■ C9-ALS + C-RNAi  
■ Healthy + SRSF1-RNAi    ■ C9-ALS + SRSF1-RNAi

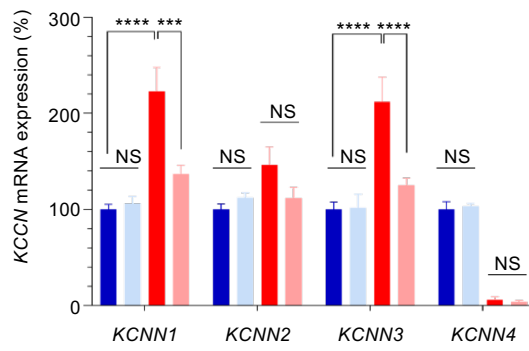

Supplement: 13024_2021_475_MOESM21_ESM.pdf [file 13024_2021_475_MOESM21_ESM.pdf]
